# Supplementary material
Source: PubMed Central journal article supplement (PMC8454646)
Supplement: mmc2.pdf [file mmc2.pdf]

## Pre 2000

### Unmatched

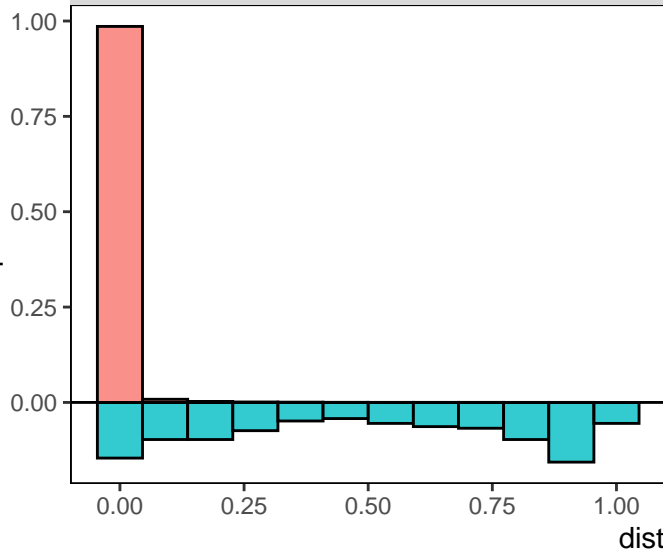

### Matched

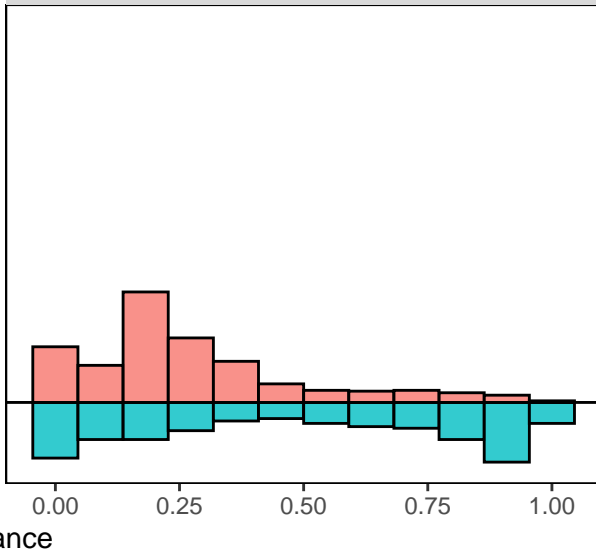

Hospital  
Critical Care

## Post 2000

### Unmatched

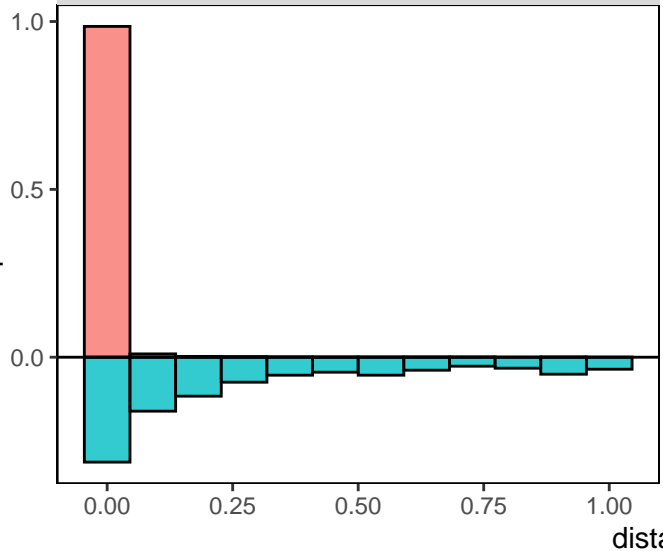

### Matched

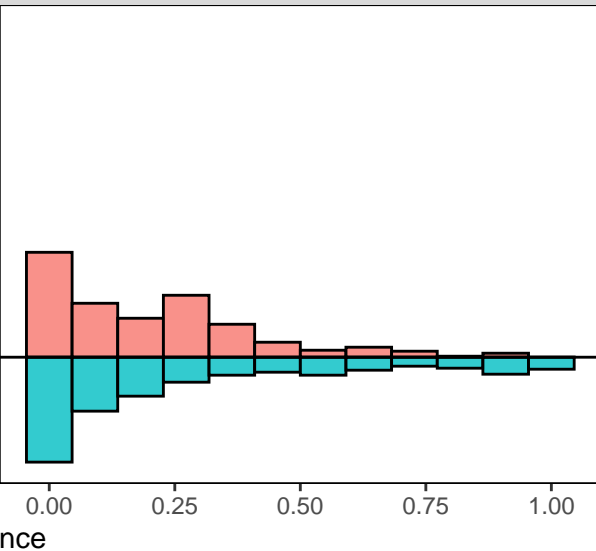

Hospital  
Critical Care
